# Supplementary material
Source: Springer Nature journal article supplement (https://www.springermedizin.de/resource/supplementary/12890_2009_157_MOESM1_ESM.pdf/9506106)

# Leukocytes in lung compartments

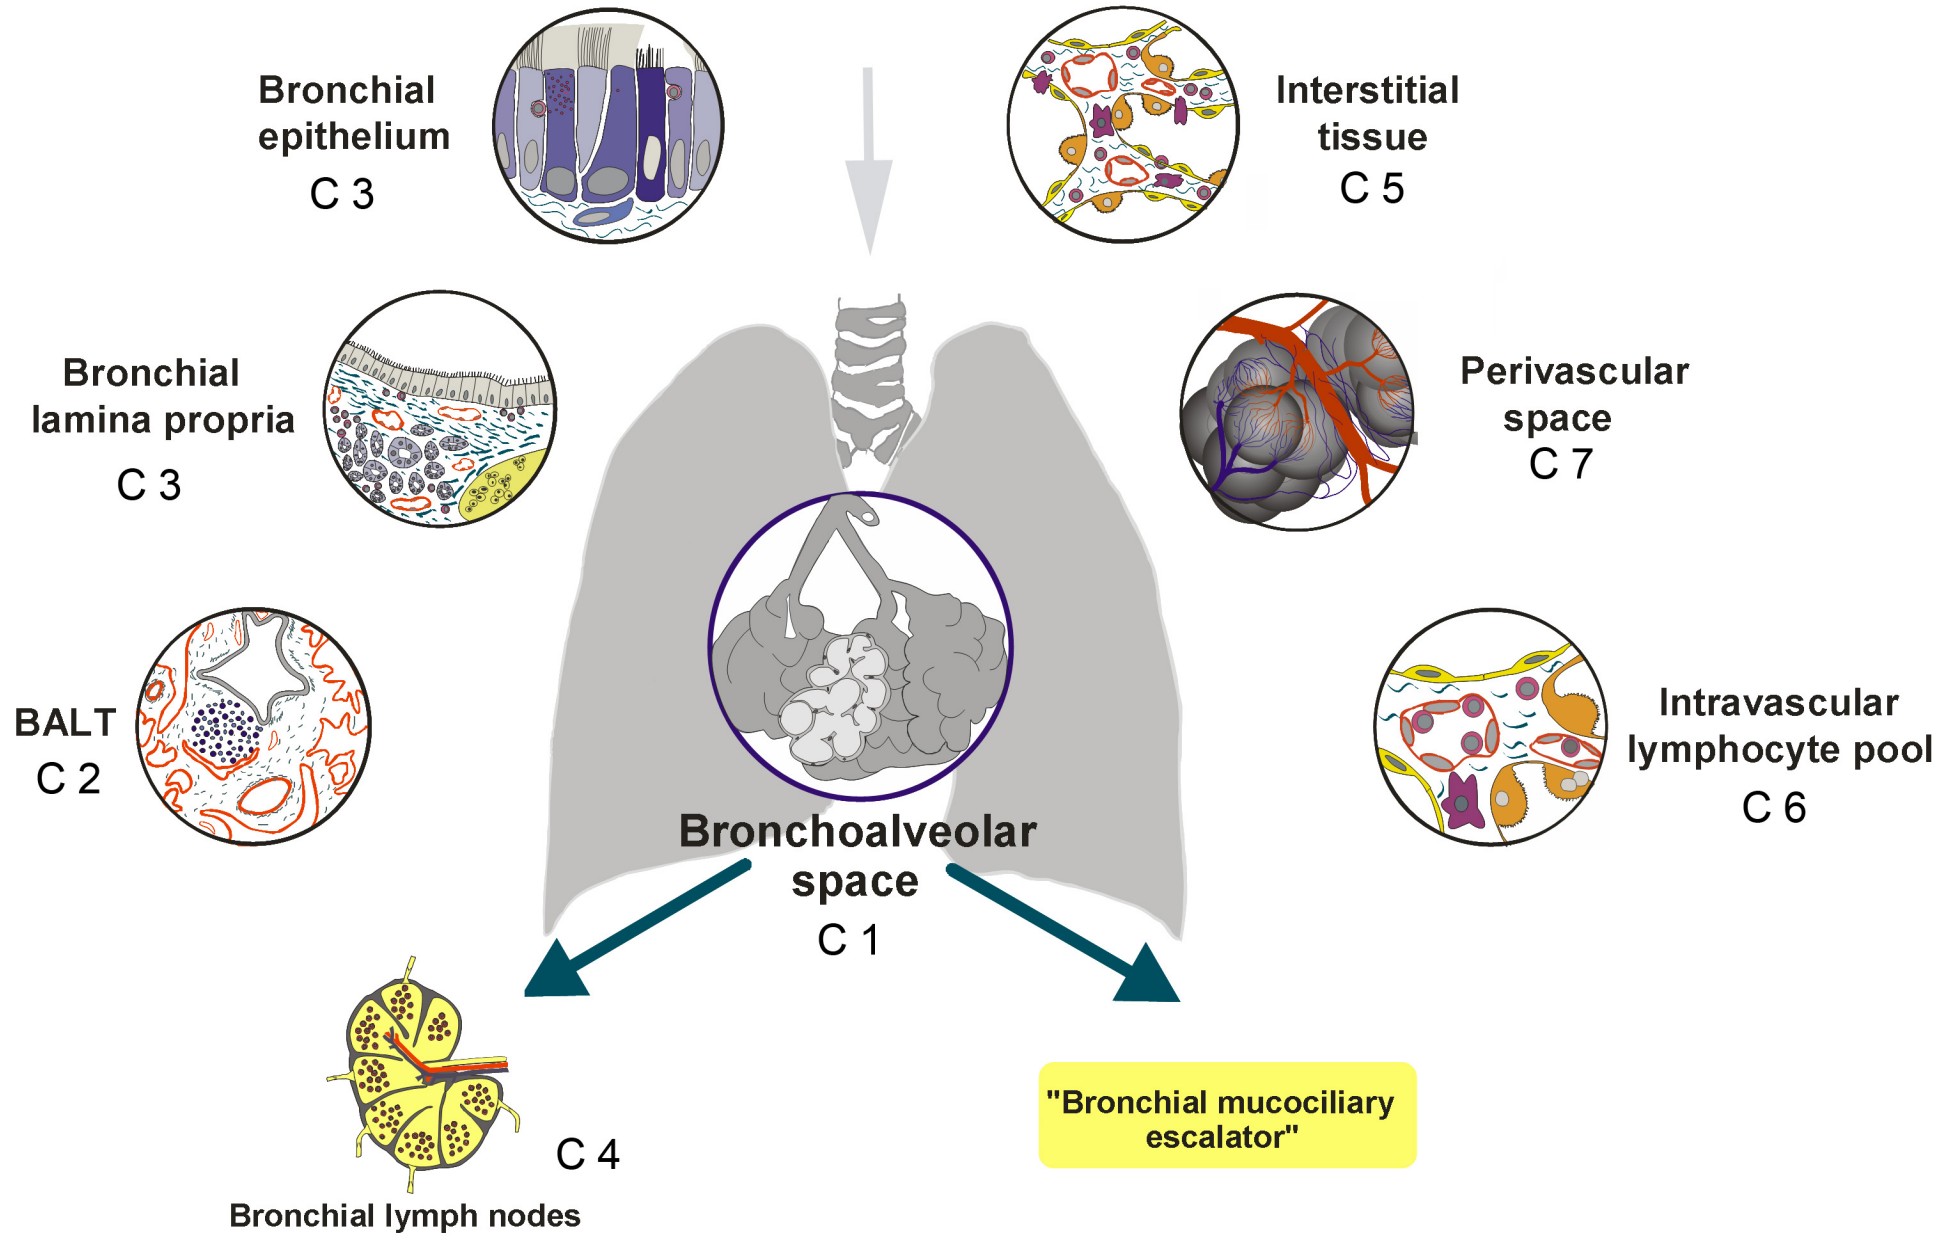

Supplement: MOESM1 [file 9506106]
